# Supplementary material
Source: publisher site journal article supplement (https://www.degruyterbrill.com/publication/isbn/9783839435366/downloadAsset/9783839435366_Leseprobe.pdf)
Supplement: Supplementary file 1 [file 9783839435366_Leseprobe.pdf]

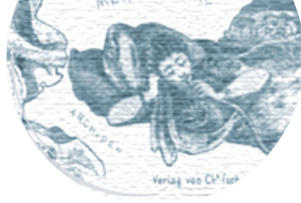

Aenne Gottschalk, Susanne Kersten,  
Felix Krämer (Hg.)

# Doing Space while Doing Gender

Vernetzungen von Raum und Geschlecht  
in Forschung und Politik

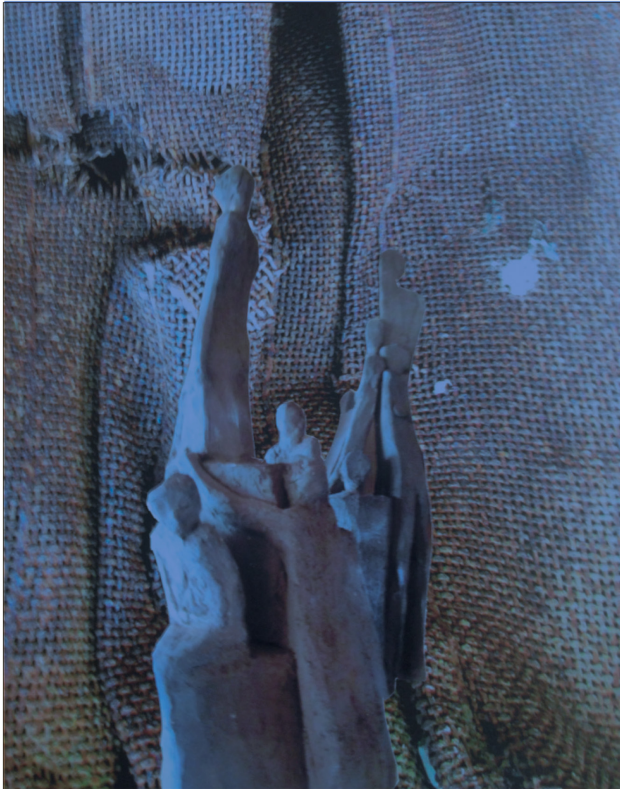

**[transcript]** ■ ■ ■ Dynamiken von Raum und Geschlecht

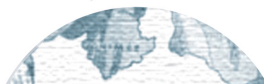

**Aus:**

*Aenne Gottschalk, Susanne Kersten, Felix Krämer (Hg.)*

## **Doing Space while Doing Gender – Vernetzungen von Raum und Geschlecht in Forschung und Politik**

September 2018, 324 S., kart., 39,99 € (DE), 978-3-8376-3536-2

E-Book: kostenlos erhältlich als Open-Access-Publikation

PDF: ISBN 978-3-8394-3536-6

Jeder Ort, jeder Körper steht in Verbindung zu anderen und wird erst in diesem Gefüge von Relationen zu sich selbst. Dieser Band entwirft Fluchtlinien im *Doing Space while Doing Gender*. In einem ersten Buchteil stellen Beiträge zentrale Begriffe wie »Exposure«, »Materialität« oder »Transsektionalität« vor. Ein zweiter Buchteil versammelt Studien – etwa zum Heiratsmarkt Ende des 19. Jahrhunderts, zu queeren Körpern in New York oder der Lyrik Gloria Fuertes’.

Durch die inhaltliche Verlinkung der Beiträge ist der Band auch als Handbuch nutzbar, soll zur Diskussion einladen und zeigt an vielen Stellen, dass Dynamiken von Raum und Geschlecht nicht zuletzt politische Fragen der Gegenwart betreffen.

**Aenne Gottschalk** forscht zu Raum, Geschlecht und Religion in der iberoromanischen Literatur der Aufklärung und lehrt spanische Literaturwissenschaft an der Universität Göttingen.

**Susanne Kersten** ist Sozialpädagogin. Sie beschäftigt sich in Praxis und Forschung mit den Themenschwerpunkten Migration und Geschlecht und lehrt zu qualitativen Forschungsmethoden.

**Felix Krämer** lehrt und forscht am Historischen Seminar der Universität Erfurt. Seine Schwerpunkte liegen in der Geschichte Nordamerikas, der Subjekt- und Medientheorie sowie in der Körper- und Schuldengeschichte.

Weiteren Informationen und Bestellung unter:  
[www.transcript-verlag.de/978-3-8376-3536-2](http://www.transcript-verlag.de/978-3-8376-3536-2)

# Inhalt

---

## **Doing Space while Doing Gender: Eine Einleitung**

Aenne Gottschalk, Susanne Kersten & Felix Krämer | 7

[EINLEITUNG]

## **I Fluchtlinien von Raum und Geschlecht**

### **Exposure**

Christine Hentschel & Susanne Krasmann | 43

[EXPOSURE]

### **Historisierung**

Marian Füssel | 51

[HISTORISIERUNG]

### **Körper**

Imke Schmincke | 63

[KÖRPER]

### **Materialität**

Heiko Stoff | 77

[MATERIALITÄT]

### **Medialität**

Maria Fritsche | 93

[MEDIALITÄT]

### **Transsektionalität**

Björn Klein & Felix Krämer | 105

[TRANSSEKTIONALITÄT]

### **Visualisierung**

Silke Förschler | 117

[VISUALISIERUNG]

## **II Studien zu Raum und Geschlecht**

### **Der „imperfekte“ Körper auf dem Heiratsmarkt – ein Beitrag zu Disability in Heiratsannoncen des Kaiserreichs**

Tamara Frey [HEIRATSMARKT] | 127

### **„Things are not what they seem“: Female Impersonation in New York um 1900**

Björn Klein [IMPERSONATION] | 147

### **„Soy madre, de todos los niños del mundo“ – Mutterschaft und Kinderlosigkeit in Gloria Fuertes' Poesie und Rezeption**

Gabriele Hassler [MUTTERSCHAFT] | 179

### **Team Maleficent – Das Monströse Weibliche und/als das Monströse Queere bei Disney**

Beatrice Frasl [MONSTER] | 201

### **„Tahrirplatz in Köln“? – Sexualisierte Gewalt im öffentlichen Raum zwischen Aneignung und Zuschreibung**

Marei Schmoliner [TAHRIRPLATZ] | 223

### **Vergeschlechtlichung und Rationalisierung in Verwaltungspraktiken des öffentlichen Nahverkehrs**

Joana Coppi [VERGESCHLECHTLICHUNG] | 257

## **III Diskussion**

### **Macht, Raum, Geschlecht? Perspektiven auf gegenwärtige Politiken**

Mit Mechthild Bereswill, Ines Kappert und Simona Pagano.

Moderiert von Mart Busche und Felix Krämer [DISKUSSION] | 287

**Dank** | 317



# Doing Space while Doing Gender:

## Eine Einleitung

---

*Aenne Gottschalk, Susanne Kersten, Felix Krämer*

„Today you’re under arrest!“ ist das erste, was die junge Geflüchtete aus der Nähe von Mogadischu hört, nachdem sie die Grenze nach Deutschland überquert hat. Eine lange Reise hatte sie aus Somalia über Kenia und Italien dorthin geführt. Bis zu diesem Punkt konnte sie sich auf ihre erwachsene Begleitung verlassen, ohne selbst zu sprechen, die Pässe im Gepäck. Nun landet sie als Mädchen in einer Jugendhilfeeinrichtung, betreut von Sozialpädagog\_innen, wohnt mit anderen in einer Gemeinschaft, geht zur Schule. Naheliegender zu denken: Sie hat es geschafft – angekommen in Sicherheit! Doch beschäftigen sie große Sorgen, denn Nachrichten haben sie erreicht, dass ihr Weggang ihre Mutter in Gefahr gebracht habe. Wenige Wochen später ist das Mädchen spurlos verschwunden.

Ausschnitte einer Biographie, festgehalten nachdem sich ihr Weg an einem Ort mit dem einer Sozialwissenschaftlerin kreuzte (Kersten 2016). Schlaglichter einer Lebensrealität, in welcher Raum wie Geschlecht als wirkmächtige Dimensionen aufscheinen. Wechselwirkungen zwischen ihnen – immer in Bewegung – lassen Beziehungen entstehen, produzieren soziale und politische Zusammenhänge, konstituieren Macht und schaffen Differenzverhältnisse. Solche Differenzen sind jedoch vorläufig, immer im Werden und wirken gerade hierdurch äußerst materiell. Dabei steht nichts für sich, keine Identität verweist nur auf sich selbst. Jegliche Eigenschaft, jeglicher Ort, jeder Körper steht in Verbindung zu anderen und wird erst in diesem Gefüge von Relationen zu sich selbst. Unsere Untersuchungen des

Wechselverhältnisses von Raum und Geschlecht, das die Texte dieses Bandes samt ihrer einleitenden Überlegungen abbildet, basieren dementsprechend auf zwei zentralen Grundannahmen: Erstens sind sowohl Raum als auch Geschlecht Resultate von Konstruktionsprozessen, die nicht als gegeben vorausgesetzt werden können. Zweitens sind beide relationale Kategorien, die performativ aufeinander bezogen sind. In der Dynamik von Raum und Geschlecht machen wir ein maßgeblich strukturierendes Moment aus, in dessen Spannungsfeld sich soziale Wirklichkeit repräsentiert. Das bedeutet, Räume können Geschlechterkonstruktionen schaffen und verändern, und umgekehrt. Raum-Geschlechterverhältnisse sind demnach nicht statisch oder genuin, sie aktualisieren und verfestigen sich fortlaufend, sind sowohl Produkt dieses Prozesses als auch entscheidend an der Produktion dessen beteiligt, was wir als Realität wahrnehmen. In diesem Sinne interessiert uns die Verräumlichung von Geschlecht und die Vergeschlechtlichung von Raum. Wir wollen diesen Zusammenhang als Vernetzung von *Raumkörperpraktiken* fassen. Mit Raumkörperpraktiken heben wir Konstitutions- und Konstruktionsprozesse hervor und verstehen Körper als eine reziproke Schnittstelle innerhalb der Dynamik des *Doing Space while Doing Gender*. Mit Raumkörperpraktiken können wir so die Produktion des Sozialen als Subjektivierung, Materialisierung, Verortung und Verkörperung sozialer Wirklichkeit erfassen.

In gegenwärtigen Raumarrangements ist die moderne Zweigeschlechterordnung eines der wirkmächtigsten Dispositive (vgl. zum Dispositiv-Begriff Foucault 1978: 119f.), tief eingeschrieben in soziale Ordnungen und gesellschaftliche Strukturen. Im Gender-Dispositiv repräsentieren und aktualisieren sich Weiblichkeit und Männlichkeit fortlaufend. Eine junge Frau wird zum Mädchen – oder umgekehrt. Die Geflüchtete wird zur Fremden, zum hilfsbedürftigen Mädchen oder zur Verschwundenen in einem bestimmten Raumarrangement, das sich historisch bildet, geografisch abgegrenzt und in konkreten Raumpraktiken reproduziert wird. Die Zweigeschlechterordnung hat sich zeiträumlich ausgebildet, ist als Dispositiv historisch und räumlich jedoch nicht exakt abgegrenzt, wie zentrale Arbeiten der Geschlechtergeschichte längst gezeigt haben (Hausen 1976; Scott 1988; vgl. Opitz-Belakhal 2010). Und Geschlechterarrangements sind verschränkt mit einem Dispositiv um *race*, sowie mit Klassendifferenzen und vielschichtigen und vielfältigen Grenzlينien der Zugehörigkeit, die Räume durch Körper stratifizieren

(Netzwerk Körper 2012). Entsprechend lässt sich die Zweigeschlechterordnung auch nur in ihren Interdependenzen mit anderen sozialen Differenzlinien im jeweiligen Kontext begreifen – im Sinne einer intersektionalen Perspektive, worin unterschiedliche Achsen identitärer Zuschreibung und Marginalisierung sich kreuzen (Crenshaw 1989).

Wie in unserer Podiumsdiskussion am Ende dieses Bandes für gegenwärtige Debatten eingehender ausgeführt wird, sehen wir in einem solchen Gender-Dispositiv sowohl ein Forschungsprogramm als auch den Ort politischer Auseinandersetzung. [DISKUSSION]<sup>1</sup> Es ist ein zeiträumliches Gebilde, in dem sich bestimmte Raumkörperkonfigurationen moderner Gesellschaften beschreiben lassen, die im Dispositiv Wirkmacht entfalten. Die Untersuchung dieses spezifischen Dispositivkomplexes um Geschlecht ist ein Desiderat aus der Perspektive der Raumanalytik, kann aber auf umfassende Überlegungen zur Dispositivanalyse und verschiedene Konzeptionen des Foucaultschen Dispositivbegriffs zurückgreifen (u.a. Bührmann/Schneider 2008; van Dyk 2013). Die Wahrnehmung der dispositivischen Verfasstheit von Geschlecht öffnet den Blick in die Vermachtung derjenigen sozialen, topografischen oder medialen Räume, in denen es entstand und immer wieder entsteht. Demzufolge sind die Raumkörperpraktiken, um welche die Beiträge dieses Bandes kreisen, Teil des Forschungsprogramms innerhalb der Analyse eines Gender-Dispositivs, das als Komplex gleichzeitig überschritten werden soll, um auch transgressive Bewegungen und Körperbildungen mit zu erfassen. Um diese Überschreitungen zu greifen, diskutieren wir im zweiten Teil dieser Einleitung den Begriff der Transsektionalität als Erweiterung des Intersektionalitätskonzepts. [TRANSSEKTIONALITÄT]

Mit unterschiedlicher Gewichtung ließen sich aus intersektionaler bzw. transsektionaler Perspektive an die Geschichte der verschwundenen Geflüchteten vom Beginn dieser Einleitung Fragen stellen wie: Welche Strukturen wirkten auf die Entscheidung, ihren Herkunftsort zu verlassen? Setzten patriarchale Verhältnisse ihre Reise in Bewegung oder verdichteten sich Räume und Raumkörperpraktiken in dem Moment neu, als die junge Frau

---

1 Die Texte dieses Bandes sind miteinander verbunden. Die [VERLINKUNGEN] sind durch eckige Klammern gekennzeichnet. In der PDF-Version, die über die transcript-Verlagsseite kostenlos zur Verfügung steht, ist die Hyperverlinkung auch technisch nutzbar.

aufgegriffen, als sie verhaftet, als minderjähriges Mädchen erfasst und in einer spezifischen Hilfestruktur untergebracht wurde? Welche Macht wirkt in Raumkörperpraktiken dieser Art auf Geflüchtete, mit welchen Normen werden ihre Geschichten und ihre Identitäten verschränkt? Wohin führt ihr Verschwinden?

Ohne weitere Forschung lässt sich wohl kaum feststellen, wo Vernetzungen zu dicht oder nicht dicht genug waren, wo sich zwischen Willkommenskultur und Umverteilungsschlüsseln mittlerweile machtvolle Diskurse ausgebreitet haben, die xenophobe Figuren medial befeuern. [DISKUSSION] Lassen Grenzziehungen und Verschiebungen in ferne Lager das Verschwinden jenes Mädchens aus der Hilfseinrichtung zur systematischen Regulierung einer unhinterfragten Normalität werden? Andererseits navigieren doch Menschen – so gefährdet ihr Leben dabei ist – durch diese politische Topografie aus Diskursen und Praktiken, müssen sich (auch) in ihrer Geschlechtlichkeit immer wieder markieren lassen und handeln gleichzeitig immerfort. Inwiefern bringen sich Menschen in der Raumkörperbewegung selbst mit hervor? Wo ließe sich Widerstand gegen Festsetzungen, Zuweisungen oder Abweisungen organisieren? Um zu zeigen aus welchen Richtungen wir solche Fragen nach Räumen, Körpern und Macht stellen können, wollen wir nun zunächst unsere Perspektive verorten.

## ERSTE VERORTUNG

Neben den Diskussionen auf einer Tagung zu Raum und Geschlecht, die 2016 in Göttingen unter dem Titel *Interdisciplinary Matters* stattfand, nimmt dieser Band den jüngsten Forschungsstand zum Zusammenhang von Raum und Geschlecht zum Ausgangspunkt.<sup>2</sup> Diesen Forschungsstand bilden die beiden in der Reihe bereits erschienenen Sammelbände aus der Arbeit des Graduiertenkollegs *Dynamiken von Raum und Geschlecht* ab. So erarbeitet

---

2 Vgl. Hettling, Gianna/Trostmann, Julian: *Interdisciplinary Matters: Doing Space while Doing Gender*. Neue Perspektiven auf Materialität, Medialität und Temporalität. Abschluss Symposium des DFG-Graduiertenkollegs 1599 am 28. und 29. Juli 2016 an der Georg-August-Universität Göttingen, GENDER, 1-2017, S. 154-159.

der Eröffnungsband der Reihe die Programmatik und zeigt an ersten Forschungsergebnissen die theoretischen und methodischen Eckpfeiler des Feldes auf (Förschler/Habermas/Roßbach 2014). Der zweite Band vertieft und verzweigt die aufgeworfenen Fragen (Lehmann/Müller-Wienbergen/Thiel 2015). Auf seinem Einband ist die Fotografie eines umstrickten Baumes abgebildet. Das Bild einer politischen Protestaktion im öffentlichen Raum ist eine Darstellung, die sich möglicherweise mit weiteren Fluchtlinien verknüpfen lässt. Gilles Deleuze und Félix Guattari, auf die wir uns an dieser Stelle beziehen, verstehen Fluchtlinien jedoch als Teil einer rhizomatischen Struktur untergründiger Verbindungen (Deleuze/Guattari 1992: 19). Ein Rhizom ist eine Art vernetztes Wurzelwerk unter der Oberfläche, das weder zu einem Baumstamm aufwachsen wollte, noch sich ohne Weiteres umstricken oder fotografieren ließe. Vielmehr beinhalten die Fluchtlinien des Rhizoms auch viele noch unbeschriebene Möglichkeiten. Die Raumidee einer so noch nicht ausdefinierten, unabgeschlossenen und dynamischen Vernetzung unter der Oberfläche wollen wir aufgreifen und weitere Dimensionen und Wege darin erforschen. So werden die Texte dieses Bandes, von der Einleitung über unsere Fluchtlinientexte und die empirischen Studien bis in die Podiumsdiskussion, ein rhizomatisches Netz entfalten, an das weitere Arbeiten oder kulturelle Interventionen anschließen können.

Doch in welcher wissenschaftsgeschichtlichen Genealogie verorten wir diese Forschungsbewegung? In der geschichts- und literaturwissenschaftlichen Diskussion war zunächst eine Hinwendung zur Topografie ein Ausgangspunkt des sogenannten *spatial turns*, wie Stephan Günzel in der Herleitung eine Hinwendung zur Topologie erklärt (Günzel 2017: 107ff. vgl. Schlögel 2002; Böhme 2005). Im Zuge der Raumanalytik entstanden in den vergangenen Jahren eine Vielzahl an Forschungsarbeiten, wobei die Immanenz von Geschlechterverhältnissen in Raumkonfigurationen nicht durchgehend mitanalysiert wurde – im Gegenteil. Vereinzelt griffen Arbeiten aus dem Bereich der Sozialwissenschaften *gender* als eine Untersuchungskategorie in Raumbildungen mit auf (Löw 1993; Ruhne 2011). Die Wahrnehmung der mehrfach verdeckten und bis in die kleinsten Winkel eingeschriebenen Machtwirkungen von Geschlecht auf Raumproduktion machte das Forschungsfeld zwar für tiefergehende, interdisziplinäre Analysen zugänglich, brachte aber keineswegs eine Synthese zweier Kritikstränge hervor. Dennoch waren verschiedene Arbeiten der feministischen Theorie und Re-

flexion immer auch Einarbeitungen von Positionierungen, von Raumkörperverhältnissen und Analysen der Stratifizierung von Räumen (bspw. Gildemeister/Wetterer 1992). Umso bemerkenswerter ist es, dass sich die Hinwendung des kulturwissenschaftlichen Blicks zum Raum zunächst weitgehend ohne geschlechterkritische Ambition gestaltete, obwohl der *spatial turn* als verdichtete Forschungsentwicklung jünger ist als die Geschlechterforschung in all ihren Facetten seit die interdisziplinäre Frauenforschung der 1960er und 1970er Jahre begonnen hatte, Geschlechterkritik wissenschaftlich zu systematisieren. Daher erstaunt die spärliche Rezeption von Geschlecht als Untersuchungskategorie innerhalb der Raumwende an der Stelle in besonderem Maße.

Auf der anderen Seite problematisierte Gudrun-Axeli Knapp noch 2010 den Mangel an systematisierter Raumanalytik innerhalb der Geschlechterforschung als längst allorten von Raum die Rede war (etwa Dünne/Günzel 2006). So stellt sie fest: „Ein spatial turn [...] würde die feministische Intersektionalitätsdiskussion bereichern“ (Knapp 2010: 261). Dies gelte auch bezüglich komparativer wie konnektiver Fragen nach Kontextbezogenheit von Wissensproduktion, was für die feministische Forschung ein zentrales Thema sei. Knapp ergänzt, es gehe um die Wahrnehmung des Problems, in welcher Weise „soziohistorische Resonanzräume“ in theoretische Konzepte hineinspielen, was eine verstärkte Aufmerksamkeit für die geschichtsräumlichen Implikationen von Theoriebildung in spezifischer Weise für die intersektionelle Makroperspektive bedeuten würde.

Der Zusammenhang von Historizität und Makroperspektive lenkt unweigerlich den Blick auf den Ort, wo in den virtuellen Bücherregalen Michel Foucaults Texte abgelegt sind. Wie sich gesellschaftliche Ordnung historisch verräumlicht und verkörpert wird, sind Grundfragen in der Arbeit Foucaults. Als Edward Soja in *Postmodern Geographies* (1989) eine *spatial turn* proklamierte, galt ihm Foucault als Referenz. Neben den Texten Henri Lefebvres galt Soja insbesondere Foucaults Vortragsskript *Von anderen Räumen* (1967) als Signifikant einer breiter angelegten Raumwende in den Sozial- und Kulturwissenschaften. Foucault beschreibt darin das Zusammenwirken von Raum und Zeit als eine „fatale Kreuzung“, was uns im Hinblick auf die historische Dimension vieler Beiträge dieses Bandes besonders wichtig erscheint. (Foucault 2006: 317). [HISTORISIERUNG] Im Zusammenspiel von Raum und Zeit entsteht eine Aktualität, die verschleiert, dass es sich dabei schon um eine Repräsentation von Raum handelt, in die Denkmodelle

und Annahmen eingelagert sind. Die Historizität geht in der jeweiligen Gegenwart auf und führt zu der besagten Aufhebung oder Verschleierung der Zeit. Die Zeit kann dabei jedoch als Kalibrierungsmoment begriffen werden, aus welchem heraus sich sowohl unterschiedliche Raumdimensionen als auch Figurationen in diesen Dimensionen ergeben. Mit Foucault war innerhalb der Räume, die er als Gegenräume, als buchstäblich *andere Räume* konzipierte, auch schon der Körper im Spiel. Geschlecht als durchgreifende Analysekategorie scheint aber in Foucaults Körperraumarrangements – gerade was den historiografischen Blick betrifft – nicht systematisch angelegt (Epple 2004). Jedoch birgt bereits die Debatte der 1990er Jahre um die Materialisierung von Geschlechterdifferenz und namentlich in Judith Butlers Dekonstruktion mit einem hierfür geschärften Verständnis von Performativität das Potential zur Analyse von Raumkörperpraktiken (Butler 1993; Stoff 1999).

In diesem Sinne ist für die Konzeption eines historischen Gender-Dispositivs anzufügen, dass sich innerhalb der „fatalen Kreuzung“ von Raum und Zeit Kategorisierungen von männlich und weiblich als bis tief in die Organe oder Zellen gravierte Konzeptionen des Körpers finden. All dies ist eng verflochten mit der Historizität der öffentlichen Sphäre, mit der historischen Konzeption des Privaten, mit Handlungsoptionen und Handlungsweisen, mit Erfahrungen und Diskursen, kurz: dem Politischen (Duden 1987; Honegger 1991; Lorenz 2000; Habermas 2000; Netzwerk Körper 2012). Zwar spielen Geschlechtskörper, sowie in ihnen und durch sie produzierte Praktiken auch in vormodernen oder nicht im engeren Sinne westlich-modernen Räumen eine bedeutsame Rolle, wie Mediävistinnen und postkoloniale Kritiker\_innen der eurozentrischen Geschlechterdifferenzpolitik herausgestellt haben (Spivak 2014; Baumgärtner/Panse 2016). In Korrespondenz damit muss die historische Spezifik moderner Geschlechterordnungen aber gerade deshalb Untersuchungsgegenstand von Raumanalysen werden (Trepp 1996; Opitz-Belachal 2010; Schuster 2010; Rau 2017: 146).

Jenseits aller Unterschiede haben die Auseinandersetzungen um Raum und Geschlecht in den Kultur- und Geisteswissenschaften gemein, dass sie durch die Hinwendung zum Sozialen tiefgreifende Neuorientierungen erfuhr. Mit den neuen Forschungsansätzen rückten gesellschaftliche Konstellationen und Fragestellungen ins Blickfeld, die eng verzahnt sind mit gesellschaftlichen Debatten um soziale Ungleichheit und letztlich (auch) um Materialität, was die Rede von einem *material turn* forciert. [MATERIALITÄT]

Eine damit in engem Zusammenhang stehende Frage, der wir im Verlaufe dieses Buches immer wieder begegnen, ist die nach Dynamik: Werden soziale Räume erst durch Körper in Bewegung und sozialen oder medialen Bewegungen in den Geschlechterverhältnissen erschaffen? [MEDIALITÄT] Bilden der topologische Raum und der menschliche Körper, also Stofflichkeit oder technische Strukturen und Körperlichkeit, eine Grundlage unserer sozialen Situiertheit? [VERGESCHLECHTLICHUNG] Zur Untersuchung dieser Fragen entfalten wir im Begriff der Raumkörperpraktiken vor allem einen praxeologischen Begriff, der an Subjektbildungen anschließt sowie in Dispositivanalysen Anwendung findet (Reckwitz 2008; Haasis/Rieske 2015). [KÖRPER] Mit Blick auf Praktiken verbindet sich Geschlecht als Wissenskategorie mit topologischer Analytik, wodurch die mehrdimensionale Dynamik von Raum und Geschlecht erkennbar wird (Latour 2010).

Um uns solchen Fragen systematisch zu nähern, wollen wir zunächst die Intersektionalität von Geschlecht in ihrer Historizität genauer umreißen – theoretisch und an ausgewählten Beispielen. Auf diesem Wege möchten wir ausloten, wie und wo Geschlecht als Analysekategorie in raumtheoretische Konzepte gerät. Dann werden wir noch einmal zu anderen Räumen zurückkehren und von dort aus verschiedene Horizonte betrachten, die sich womöglich über gekerbten und glatten Räumen aufspannen (Deleuze/Guattari 1992). Am Ende wird die Fokussierung von Geschlecht als Körperpraxis stehen, woran wir versuchen, eine transsektionale Forschungsperspektive in Anlehnung an den Begriff der Intersektionalität weiter aufzufächern.

## INTERSEKTIONALE ORTUNGEN

Als Thomas Laqueur zu Beginn der 1990er Jahre unter einer bestimmten Perspektive auf Körperdiskurse und Sexualität behauptete, dass es vor dem 18. Jahrhundert kein Zweigeschlechtermodell gegeben habe, regte sich vielerorts Widerspruch (Laqueur 1990; vgl. hierzu Flüchter 2015: 85f.). Verschiedene Einsprüche haben seither gezeigt, dass eine solche historische Setzung nicht in jedem Winkel des Sozialen Bestand haben kann (Bock/Zimmermann 1997; Bennett 2007). Neben einer kontroversen Diskussion galt vielen Arbeiten die These vom Eingeschlechtermodell aber auch als Anregung, in Forschungen das Für und Wider dieser Idee zu prüfen. [HISTORISIERUNG] Dementsprechend ist für den Fokus auf Geschlechtskörper und



Räume weniger der empirische Befund von Laqueurs holzschnittartiger These, als vielmehr seine kritische Pointe mit Blick auf die gegenwärtige Epoche und ihre Spezifika spannend. Denn gerade die moderne Geschlechterdifferenz, auf deren raumgreifende Wirkmacht sich die Beiträge dieses Bandes konzentrieren, besitzt an sich eine partikulare zeit-räumliche Historizität in Bezug auf Sexualitäts- und Geschlechtergeschichte, was wir mit dem Begriff des Gender-Dispositivs zu fassen versuchen.

In gravierendem Maße – und da drängt zu *gender* eine weitere Differenzkategorie ins intersektionale Feld – ist der moderne Rassismus in seiner Genealogie eng verwoben mit modernen Geschlechterordnungen. Das weist über den sogenannten Westen hinaus und ist gleichzeitig ökonomisch wie rechtshistorisch untrennbar mit seinen Freiheitskonzepten verwoben (Patterson 2008). Sedimentiert in unzähligen Praktiken, täglich angewandten Konzepten und immer wieder iterierten Diskursen sind Eurozentrismus und rassistische Grenzziehungen eingelassen in Räume und Körper, was nicht zuletzt postkoloniale Kritiken seit den 1990er Jahren an vielen Stellen, eben auch unter starkem Bezug auf Räume, Topografien und Topologien und die darin ermöglichten und verneinten Körper, herausgearbeitet haben (Bhabha 1994; Castro Varela/Dhawan 2015).<sup>3</sup>

Wenn Stephan Günzel nun auf die Raumvergessenheit in der Historiografie hinweist, die durch die Raumwende gekontert wurde, scheint dies immanent mit der Verdrängung kolonialistischer Phantasie und Praxis im eurozentrischen Geschichtsbewusstsein verknüpft (Günzel 2017: 110). An dieser Stelle bleiben Kritiken bedeutsam, die bis in die verwendeten theoretischen Bezüge reichen. So hat Ann Laura Stoler Foucaults sexualitätshistorischen Arbeiten auf ihre eurozentrischen Setzungen abgeklopft (Stoler 1995). Das Hinterfragen der richtungsweisenden Theoreme ist entscheidend, wenn wir Untersuchungen von Raumkörperpraktiken als konstitutiv und konstruktiv im Politischen begreifen wollen. Das scheint uns hier deshalb betonenswert, weil, obwohl in diesem Buch postkoloniale Raumarrangements und Zusammenhänge nicht im Zentrum stehen, auch für Raumanalysen gilt, dass sie immer in der ein oder anderen Weise in Bezug zum eurozentrischen Projekt

---

3 An der Stelle schließen Perspektiven an, die zeigen, wie *whiteness* tief in diejenigen soziale Muster eingeschrieben ist und exklusiv darin wirkt, die wir als Raumkörperpraktiken auf ihre Produktivität hin untersuchen (vgl. Eggers et al. 2006).

geschaltet sind oder sich daran abzuarbeiten haben (vgl. Gilroy 1993; McClintock 1995; Chakrabarty 2000).

Eine weitere Dimension, die damit eng zusammenhängt ist Klasse. Bereits in der Raumtheorie Henri Lefebvres spielt die Reproduktion des Sozialen als Produktion sozialer Differenz die Hauptrolle (Lefebvre 1974; Soja 2005; vgl. für eine Verbindung mit feministischer Theorie: Bauer 2015). Lefebvre stellt den sozialen Raum als ein gesellschaftliches Produkt heraus. Er rückt Praktiken der Raumproduktion in den Vordergrund und indem er drei Facetten des Raumes – *l'espace perçu*, *l'espace conçu* und *l'espace vécu* – in ihrem Zusammenwirken analysiert, löst er den Raum ein Stück aus einem marxistischen Interpretationsfeld, in welchem Räumlichkeit lediglich im materiellen Sinne der Produktionsmittel zu begreifen war. Vielmehr wird nach Lefebvre Raum fortlaufend in Aneignungsprozessen produziert. Die dabei aus der Verknüpfung von Orten entstehenden Raumrepräsentationen firmieren als Wirklichkeiten, die „gelebt und erlitten“ werden (vgl. Lefebvre 2006: 330ff.; Goonewardena et al. 2008).

Es war ebenfalls Edward Soja, der neben Foucaults Raumkonzeptionen, Lefebvres 1974 erschienenen Text *La production de l'espace* als Teil einer grundsätzlicheren Hinwendung zum Raum und als Signifikant für ein neues (geographisches) Raumverständnis in der kritischen Sozialtheorie herausstellte. Soja nutzte Lefebvres politische Programmatik, um aufzuzeigen, wie die Humangeographie mit Ideologien aufgeladen wurde und versuchte diese Ideologisierung zu überwinden, indem er das sozialkritische Potential auf seine Disziplin anwendet. Dies zielte auf die Loslösung von fixierter Räumlichkeit im geographischen Raum in der sozialwissenschaftlichen Auseinandersetzung mit der Kategorie. Soja führt aus:

„The problematic connection of social and spatial reproduction follows straightforwardly. If spatiality is both outcome/embodiment and medium/presupposition of social relations and social structure, their material reference, then social life must be seen as both space-forming and space contingent, a producer and a product of spatiality. This two way relationship defines – or perhaps, redefines – a socio-spatial dialectic which is simultaneously part of a spatio-temporal dialectic, a tense and contradiction filled interplay between the social production of geography and history.“ (Soja 1989: 129)

Soja beschreibt hier im Anschluss an Lefebvre nicht nur die Gleichzeitigkeit von Raum als Teil und Ergebnis von Raumproduktion, sondern stellt diesen in ein dialektisches Verhältnis räumlicher und zeitlicher Prozesse. Und obwohl er auch mit seinen Überlegungen zu einem *Thirdspace* (1996) eng an Lefebvre anknüpft, verweist dieser Dritt-Raum, in dem auch die Raumkörperpraktiken zu suchen wären, ebenso auf Kritiken an gewaltsamen Weltverhältnissen in den 1990er Jahren und hat damit nicht allein Lefebvres Raumtheorie als Referenzpunkt. So gilt uns zumindest – über die von Soja proklamierte Raumwende im engeren Sinne hinaus – das postkoloniale Denken, beispielsweise in Homi Bhabhas Raumkonzeption, als entscheidend, um Konzeption von Dritt-Räumen als Orte der Differenzbildung zu verstehen (Bhabha 1994).

Dies, so wollen wir im Hinblick auf unsere Fokussierung intersektionaler Geschlechterverhältnisse an dieser Stelle betonen, involviert die Produktion unterschiedlicher Körper, Lebensbedingungen und Erfahrungen mit vielfältigen Differenzen in diese Raumarrangements. Zudem sind für Soja Repräsentationsräume – wie für Lefebvre – gerade solche, die aufgeladen sind von Politiken und Ideologien, in denen sich das Reale mit dem Imaginären in Verbindung setzt. Für unsere Forschungsperspektive sind das jene Orte, an denen sich Macht, Herrschaftsprozesse, Unterwerfungsbeziehungen, Rassismen, Sexismen und Ausgrenzungen vollziehen, wie Kimberlé Crenshaw es für Vergewaltigungen in New York oder Abtreibungskliniken in Los Angeles überzeugend gezeigt hat (Crenshaw 1989 u. 1991; vgl. auch Mackert 2016). Es ist der gelebte, erlittene, gespürte Raum, in dem sich Subjektivierungen und Kollektivierung von Körper(wirk)lichkeiten von lokalen bis in globale Dimensionen hinein vollziehen (vgl. Soja 2005: 108f.). Darüber hinaus tun sich aber stets auch Gegenräume auf, in denen herrschende Ordnungen überschritten und als uneinfassbare Raumkörperpraktiken mobilisierbar werden, sich in Bewegung setzen und so Räume des Widerstands und der Emanzipation beschreiben können. [TRANSSEKTIONALITÄT]

Der Satz „Today you’re under arrest!“ wirkt vor dem Hintergrund dieser raumtheoretischen Erwägungen wie ein Stillstellen jener Raumkörperpraktiken, die das Leben einer jungen Geflüchteten bestimmten. Was sich der theoretischen Dimension in der Produktion des sozialen Raumes hier noch entzieht, ist womöglich die geschlechterpolitische Agenda, die in der Festsetzung der jungen Frau an diesem Ort, zu dieser Zeit 2016 liegt. Wir gehen jedoch davon aus, dass Geschlechterpolitik in der sozialen Raumproduktion

in einem ersten Schritt nur unter einer Intersektionalitätsperspektive zu lesen ist. Soziale Positionen in Wechselwirkungen mit ethnische Zuschreibungen und Abgrenzungen, Aneignungen oder andere gewaltförmige Verortungen zeigen sich stets mit Geschlecht verschränkt. Die Dimensionen korrespondieren dementsprechend untereinander (Crenshaw 1989; hooks 2000; Knapp 2013). Gerade, weil diese Zusammenhänge nicht überall, in allen topografischen, kartografischen und topologischen Raumbildungen auf den ersten Blick zu erkennen sind, ist es entscheidend Geschichte, mediale Raumproduktionen und das Soziale genau auf diese Reproduktionsverhältnisse hin zu befragen. Wir möchten das immanente Wechselverhältnis der Kategorien an einem konkreten Beispiel pointieren und auf Raumproduktion beziehen, indem wir uns der Geschichte einer Gruppe schwarzer Frauen in den USA der 1970er Jahren zuwenden, die einer Position innerhalb des Feminismus Stimme verschafften, für die es, wie für Geflüchtete der Gegenwart, nicht in jedem subalternen Verhältnis ungedämmten Resonanzraum gab und gibt.

Als sich 1974 in Boston eine Gruppe schwarzer Feministinnen zusammenfand und sich *Combahee River Collective* nannte, verwies bereits die Namensgebung auf Raumdimensionen in der US-Geschichte. Der *Combahee River*, ein Fluss, ein geografischer Raum, benannt nach einem Stamm, dessen Gemeinschaft im Bereich der Kolonie Carolina lebte und zu Beginn des 18. Jahrhunderts von weißen Siedlern verdrängt wurde. Der Name steht damit in einem zeiträumlichen Zusammenhang mit Siedlerimperialismus. Nicht zuletzt trafen hier unterschiedlichste Raum- und Geschlechterkonzeptionen aufeinander. Der Fluss versorgte die Reis-Plantagen South Carolinas vor dem Bürgerkrieg mit Wasser, was auf eine weitreichende ökonomische Dimension an diesem Ort verweist. Dieser materielle Beitrag des Flusses zur Plantagenbewirtschaftung war jedoch nicht der Grund für die Gruppe schwarzer Feministinnen in den 1970er Jahren Bezug auf den Ort zu nehmen. Was den Ort zum historischen Resonanzraum für die unentrinnbare Frage von Unterdrückung und Freiheit in der US-Gesellschaft in den 1970er Jahren machte, war die „Raid on Combahee Ferry“, im Zuge derer hunderte flüchtender Sklaven auf Boote drängten und über den Fluss kamen, teils in die Unions-Truppen übergingen. Harriet Tubman, eine ehemalige Sklavin, die selbst 1849 in die Freiheit geflohen war, hatte seither ihre Familie und dann unzählige versklavte Menschen in einem Transitraum, der historisch als „Underground Railroad“ firmierte, in Richtung Pennsylvania geschafft. Tubman

war im Bürgerkrieg für die Unionisten tätig und beteiligt als über 700 flüchtende Menschen in Booten den Fluss überquerten (vgl. Grigg 2014).

Es war der Zusammenhang von Ausbeutung, Marginalisierung und Freiheitskampf, weshalb das *Combahee River Collective* sich nach jenem Ort benannte und ihr 1977 verfasstes Statement Teil eines Resonanzraumes politischer Artikulation in ihrer Gegenwart werden konnte. Die von der Gruppe adressierte Mehrfachunterdrückungslage als schwarze Frauen sollte die Juristin Kimberlé Crenshaw später als Intersektionalität bezeichnen. Mit der Metapher der Kreuzung wird insbesondere ein Unterdrückungsort markiert, dessen Achsen aus verschiedenen Richtungen kommen. Wenn schwarze Frauen zum Opfer von Gewalt wurden, war nicht klar, ob die Kollision aus Richtung des Rassismus oder des Sexismus verursacht wurde. Und dass genau Geschlecht darin eine entscheidende Rolle spielt, zeigt sich immer wieder bis in die aktuellen *Black Lives Matter*-Debatte in der Permanenz des Rassismus (vgl. Alexander 2010; Krämer 2016).

Doch nicht nur der historische Bezug des Ortes, jenes Flusses, der Teil eines Frei(heits)raumes wurde, ist an dieser Stelle von Interesse. Die schwarzen Feministinnen schreiben in ihrem Statement 1977: „No one before has ever examined the multilayered texture of Black women’s lives“, was den Mangel an Problemwahrnehmung und Interessensvertretung in ihrer Welt konstatiert (Statement, zitiert aus Nicholson 1997: 66). Und insbesondere in dem Punkt „Problems in Organizing Black Feminists“ stellt sich im Zusammenhang mit körperpolitischen Fragen das Problem der Unterdrückung als eine Frage der Vernetzung und Vermachtung von Räumen. Sie beschreiben:

„The fact that individual Black feminists are living in isolation all over the country, that our own numbers are small, and that we have some skills in writing, printing, and publishing makes us want to carry out these kinds of projects as a means of organizing Black feminists as we continue to do political work in coalition with other groups.“ (Nicholson 1997: 66)

Hier werden Artikulationsräume zu Resonanzräumen, zu medialen Räumen in einer Öffentlichkeit, in welcher sich Körpergeschichten materialisieren. Schließlich schlussfolgert das Kollektiv zur raumgreifenden Dimension ihres Aktivismus: „The inclusiveness of our politics makes us concerned with any situation that impinges upon the lives of women, Third World and working people“ (Nicholson 1997: 66). Und sie äußern, dass sie soziale Räume dabei

konkret gestalten wollen und müssen. So ist am Ende des Statements zur politischen Widerstandspraxis zu lesen: „We might, for example, become involved in workplace organizing at a factory that employs Third World women or picket a hospital that is cutting back on already inadequate health care to a Third World community, or set up a rape crisis center in a Black neighbourhood“ (Nicholson 1997: 66). Hier ist die Produktion des sozialen Raumes als Repräsentationsraum verschränkt mit *gender*, *race* und *class*. Und der Raum erscheint als ein Aushandlungsort, in dessen Relationen und Bedingungen sich Emanzipation, Solidaritäten und Widerstand des schwarzen Feminismus vollziehen können.

## NEUE WEGE DURCH ANDERE RÄUME

Aushandlungsorte von Raum-Geschlechterfigurationen finden sich nicht allein in emanzipativen Schriften, die medialen und politischen Raum eröffnen, sondern auch in der Fiktion. So lässt der argentinische Schriftsteller Julio Cortázar beispielsweise in der Erzählung „El otro cielo“ (Der andere Himmel) verschiedene Perspektiven verwachsen. Ein Leben im 20. Jahrhundert in Buenos Aires, die empfundene Monotonie durch die Arbeit an der Börse und eine Leere in den Beziehungen verflechten sich mit einem Leben im *underground* von Paris im 19. Jahrhundert, in das sich der Protagonist imaginär flüchtet. Der Protagonist berichtet, wie im Laufe seiner Bekanntschaft mit der Prostituierten Josiane deren kleine, saubere und mit Zierrat gefüllte Pariser Dachstube aus der Bedeutungslosigkeit aufsteigt zum verbindenden Element, das die „Lücken“ in ihrem Dialog zu füllen vermag, eine fließende Kommunikation also erst herstellt (Cortázar 2010, I: 625). Der fiktive *underground* von Paris wird zum cielo, zum himmlischen Evasionsraum und zu einem Ort der Freiheit, in dem auch Geschlechterverhältnisse, Sexualität und normative Anforderungen an die Figuren verhandelt werden. Die Grenzen zwischen Fantasie, Erinnerung und aktuellem Erleben werden dabei immer wieder verflüssigt, nicht greifbar. So lösen sich feste Gefüge auf, während gleichzeitig die postkoloniale Geschichte Argentiniens und eine Kulturkontaktgeschichte diverser Raum- und Körperpraktiken, Ausbeutungs- und Differenzverhältnisse darin anklingen. So wird die Erzählung selbst zu einem Raum, in dem die ganze Welt enthalten sein kann, deren Grenzen und mögliche Versionen des Geschehens ausgelotet werden.

Es ist gerade die deutlich markierte Fiktionalisierung von uns bekannten Räumen, die uns die Relationalität aller Dinge und Verbindungen, ihre Gemachtheit und die eigene Relativität vor Augen führt. Mit der Fiktionalisierung geht es letztlich um ein Ringen darum, was eigentlich „Wahrheit“ in einer Weltsicht sein kann oder sollte. Erzählte Räume ermöglichen als Orte der Imagination so (auto-)biographische Arbeit, das Erleben und Studieren von Begegnungen mit dem Anderen, historische und gegenwartsbezogene Reflexion. [MUTTERSCHAFT] Die Fiktion hat dabei genau wie jede andere Kunstform womöglich den Vorteil, dass sie als Artefakt keinen allumfassenden Gültigkeitsanspruch erhebt, sondern als Medium stets auf die eigene Perspektivität verweist. Sie fordert – ebenso wie der Protagonist Cortázars – Kommunikation. Und sie fordern die Auseinandersetzung mit der Unmöglichkeit der Objektivierbarkeit. [VISUALISIERUNG]

Eine Möglichkeit, Raum in seinen unterschiedlichen Dynamiken, also intra- und interdimensional zu verstehen, bietet Foucault in seiner Beschreibung von Heterotopien. In „Die Ordnung der Dinge“ (1974 [1966]) verwendet Foucault erstmals die Bezeichnung „Heterotopie“ für jene Verräumlichungen, die mit dem Wegnehmen oder dem Kalibrieren der eingeschriebenen Taxonomie von Raum und Zeit denkbar und möglich werden. Er beschreibt Heterotopien folgendermaßen: „Die Dinge sind darin ‚niedergelegt‘, ‚gestellt‘, ‚angeordnet‘ an in dem Punkte unterschiedlichen Orten, sodass es unmöglich ist, für sie einen Raum der Aufnahme zu finden und unterhalb der einen und der anderen einen gemeinsamen Ort zu definieren“ (Foucault 1974: 20). Sie sind also über Orte verstreut und zugleich verbunden. Dennoch könne es sein, dass sie dieselben Orte definieren. Heterotopien bilden kleine, abgegrenzte Bereiche für jene Dinge, die sich nicht in die vorhandenen Ordnungsmuster einsortieren lassen, da sie sich unseren Bezeichnungen immer wieder entziehen (ebd.). So lässt sich auch verstehen, warum Heterotopien nicht ganz in der Wirklichkeit realisiert sein können und dennoch in Orten zu finden sind. Sie sind verwirklichte, inkonsistente Räume dessen, was nicht in unsere Welt passt. Die Heterotopie bildet sich aus dem Überschuss der Realitätsproduktion, aus jenen Teilen, die übrig bleiben, da sie sich nicht in die dualistische Taxonomie dichotomer Weltsichten fügen können, aber dennoch existieren. So seien sie:

„eine Multiplizität kleiner klumpiger und fragmentarischer Gebiete, in denen namenlose Ähnlichkeiten zusammen die Dinge in diskontinuierlichen Inselchen agglutinieren. In eine Ecke stellen sie die hellsten Docks, in eine andere die roten, woandershin die, die von wolligerer Konsistenz sind, dann die längeren, entweder die, die ins Violette gehen, oder die, die zu einem Knäuel zusammengeknüpft sind.“ (ebd.: 20).

Diese Beschreibung lässt unweigerlich Assoziationen zu Materialität, zu Stofflichem und zum Rhizom entstehen. Letzteres besteht bei Deleuze und Guattari aus der Vielheit von Fluchtliniendimension, wie wir oben bereits angerissen haben und was wir gleich als Raumkonzeption auf Körper und Geschlecht beziehen werden. Nachdem Foucault in „Von anderen Räumen“ jenen in „Die Ordnung der Dinge“ metaphorisch aufgeworfenen Begriff weiter ausbuchstabiert, war diese dezentrierte Form des Raumes in der Welt. So stark, wie Deleuze und Guattari von Foucaults Raumdenken inspiriert waren, so konsequent findet sich die Raumverteilung der Gegenordnungen in ihren Raumdimensionen. Entwerfen die beiden also eine systematisierte Form der heterotopischen Ordnung der Dinge? Für unser Begriffsrepertoire eröffnet ein dezentrierender Raumbegriff jedenfalls die Möglichkeit, auch Raumkörperpraktiken als Transgressionen der Normativität innerhalb eines solchen Netzes verteilter Ordnung(en) zu konzipieren. Wir kommen gleich darauf zurück.

Im Paralleluniversum der Dekonstruktion verweist die Heterotopie zunächst auf Machtwirkung und realisierte Disziplinierung, die ebenfalls als Raumkörperpraktiken zu entschlüsseln sind. Foucault stellt nämlich heraus, dass Heterotopien sowohl innerhalb als auch außerhalb des realen gesellschaftlichen Raumes verortet sein können und konkrete „Gegenorte“ darstellen. Das können Kliniken, Gefängnisse, Altersheime, Bordelle, aber auch Schiffe und letztlich auch Kolonien sein – mit allen Gewaltverhältnissen und Vernetzungen, die in ihnen und aus ihnen entstehen (vgl. Foucault 2006: 320-326). Wäre die Jugendhilfeeinrichtung, in die jene junge Frau aus Mogadischu gebracht wurde, ein solcher Ort zwischen Raum und Zeit, zwischen nationaler Grenze und Jugend bzw. innerhalb der zeiträumlichen Ordnung der Adoleszenz? Ist diese Heterotopie auf den Körper des Mädchens bezogen ein Ort zwischen Raum und Zeit? Bei Foucault haben Heterotopien gemein, dass ihnen immer eine gesellschaftliche Funktion zukommt (vgl. ebd.: 326). Im Wandel einer Gesellschaft können diese Räume dann auch umfunktionierte werden, was wiederum eine performative Verschiebung wäre (vgl. ebd.:



322). Wäre dementsprechend möglicherweise die sogenannte „Balkan-Route“, die im medialen Jargon angeblich „geschlossen“ ist, auf der viele Menschen ihr Leben aufs Spiel setzen eine heterotopische Grenze zwischen und durch nationale Räume hindurch?

Der Raum ist entlang der Foucaultschen Konzeption fähig, die Illusion zu erschaffen, dass die Zeit und damit seine Gemachtheit aufgehoben wäre. Und gerade hierdurch sind Räume nicht immer und aus jedem Blickwinkel in ihrer Produktivkraft zu erkennen. Fluchtpunkte von Raumstrukturen entziehen sich oft unserer Sicht, tarnen sich, ohne auf ihre eigene Geschichte zu verweisen (vgl. Foucault 2006: 317-319). So erscheinen Raum und Zeit auf den ersten Blick als simultane Maßeinheiten, die fortwährend vorwärts prozessieren und das Raumzeitkontinuum, ein orientierungsstiftendes Moment für das Leben bereit zu stellen. Mediale Räume können sowohl Möglichkeitsräume sein, andere Denkfiguren und Figurationen lebendig werden lassen, andererseits können sogar so tumbe Metaphern wie „Flüchtlingsströme“ in ihnen real werden. Politikerfiguren erlangen im Umfeld der medialen Aufmerksamkeitsökonomie, die sich um Raumkörperpraktiken organisiert, wirkliche Macht über die Welt. [EXPOSURE]

Wie oben am Beispiel des *Combahee River Collective* gezeigt, haben die beschriebenen theoretische Dimensionen alltagspraktische Dimensionen im intersektionalen Feld. Und in dem Moment als die junge Geflüchtete hört: „Today you’re under arrest!“ sind aus intersektionaler Perspektive Alter, Herkunft, Geschlecht, prekärer Status wie Klasse entscheidend für ihre Festsetzung. Doch was hat es mit dem Verschwinden ihres Körpers aus der Einrichtung auf sich? Wir wollen im nächsten Teil Stränge konturieren, die es erlauben, ihre Festsetzung und ihr Verschwinden körper- und raumtheoretisch aus einer weiteren Perspektive zu begreifen.

## TRANSSEKTIONALES VERFOLGEN

„Die Fluchtlinie markiert gleichzeitig die Realität einer Anzahl endlicher Dimensionen, welche die Vielheit restlos ausfüllt“, schreiben Deleuze und Guattari – und sie fahren fort: „Das Ideal eines Buches wäre, alles auf einem solchen Plan der Äußerlichkeit auszubreiten, auf einer einzigen Seite, auf ein und demselben Strand: gelebte Ereignisse, historische Bestimmungen, Gedankengebäude, Individuen, Gruppen und soziale Formationen“ (1977: 15).

Die Beschreibung verweist ohne Zweifel auf die anspruchsvolle Anlage ihres Bandes *Tausend Plateaus: Kapitalismus und Schizophrenie*, den jener Text zum Rhizom einige Jahre später einleiten sollte. Raumverhältnisse finden sich in einem abschließenden Kapitel des Bandes, in dem Deleuze und Guattari vor allem Bewegungen in und zwischen gekerbten und glatten Räumen auffächern (1992: 657-693). Sie sehen zwei Arten von Räumen in unserer Welt, die ineinander übergehen und gleichzeitig – zumindest in der Theorie – unterscheidbar sind. So nutzen sie das Bild eines glatten Raums des Nomadierenden und eines gekerbten Raums des Sesshaften (ebd.: 658). Diese beiden Raumformen, die immer im Entstehen und Vergehen sind, präparieren sie an unterschiedlichen Modellen heraus. Es findet sich neben dem Modell der Musik, des Meeres, der Mathematik, der Physik oder der Ästhetik das Modell der Technik. Das Modell der Technik erscheint für die körpertheoretische Überlegung zum transektionalen Verfolgen von Raumkörperpraktiken besonders spannend.

Deleuze und Guattari zeigen an den technischen Herstellungsweisen von Kleidung, Zeltstoffen und Mischformen – wie etwa einem Quilt – Interferenzen von Kerbung und Glättung des Raumes auf. Sie unterscheiden zwischen einem ordentlichen, in einem Webstuhl gefertigten, gewobenen Stück Stoff einerseits und Filz andererseits. Ordentliches Gewebe besteht aus vertikalen und horizontalen, sich rechtwinklig kreuzenden Fäden. Die einen sind starr, die anderen beweglich. Als Elemente sind die Fäden funktional differenzierbar im Prozess des sich Verwebens und bilden am Ende doch ein Stück, das Körper umschließen kann. Dieses Gewebe korrespondiert mit der Raumform des Gekerbten, es kerbt im Umschließen selbst Raum und Körper, denn Kleidung kann Zugänge zu Bereichen schaffen oder dieselben verschließen, Körper verhüllen oder diese gezielt in Sichtbarkeitsregimen organisieren. Nicht allein die Debatte um Ver- und Entschleierung sei hier genannt (Mathes/von Braun 2007). Kolonialistische Diskurse sind körperpolitisch unentwirrbar in solchen Raum-Geschlechterverhältnissen verwoben, die immer den individuellen Körper einzelner Personen überschreiten. Darüber hinaus ist nicht klar zu unterscheiden, wo die Materialität des Körpers endet und wo die des Stoffes beginnen könnte. Von außen betrachtet, besitzt das Material eines Kleidungsstoffes Vorder- und Rückseite, bildet Innen und Außen.

Gegen eine so geordnete Ordnung, die in Machart und Struktur des Materials praktiziert ist, setzen Deleuze und Guattari die Filzstruktur. Sie beschreiben im Filz eine glättende Materialität, dessen einzelne Elemente – die

Fasern – nicht klar voneinander zu unterscheiden sind. Es lässt sich innerhalb der Verfilzung keine funktionale Unterschiedlichkeit und auch kein Innen und Außen differenzieren. Filzungen sind unvergleichlich chaotische Strukturen, ohne Ende und Anfang. Gerade durch diese Eigenschaft schließen sie gewissermaßen nahtlos an die glatte Welt an, öffnen sich dieser und lassen sich nicht von ihr unterscheiden. Dieses Bild nutzen Deleuze und Guattari für das Nomadentum in einem weiten Sinne, das gerade nicht sesshaft werden kann, nicht kerbt, nicht umschließt, sondern sich dem Raum immer wieder neu öffnet und dabei glatte und glättende Bewegungen vollzieht.

Im Gegensatz zum glatten Raum, in dem Materialität und Körper in den Stoffen aufzugehen scheinen, korrespondiert der gekerbte Raum mit einem organisierten und klar abgrenzbaren Körper. Im gekerbten Raum werden organisierte und definierte Körper in definierten und organisierten Raumstrukturen geschaffen. Die moderne Geschlechterdifferenz ist ein Muster hierfür, das Gender-Dispositiv womöglich dessen verräumlichende Maschinerie. Der glatte Raum korrespondiert dagegen mit einem unorganisierten, mit einem unbestimmten, bei Deleuze und Guattari einem organlosen Körper (oK). Dieser Körper bewegt sich durch und im Raum. Im Raum wird der organlose Körper verteilt, wird in diesem erst mit Intensitäten beschrieben.

Nun weisen Deleuze und Guattari ja darauf hin, dass beide Korrespondenzen – das Gekerbte wie das Glatte – immer nur in Übergängen bzw. Übergangsstadien ineinander existieren können. Das wird deutlich, stellt man die Frage, welche Raumkörperpraktik durch den Satz: „Today you’re under arrest“ signifiziert ist. Die Festsetzung des Mädchens, ihre Unterbringung in einer Jugendhilfeeinrichtung wäre aus einer Perspektive eine vehement kerbende. Sie enthält aber gleichzeitig bereits eine glatte Dimension, die in dem Moment an Gewicht gewinnt, in dem das Mädchen als Flüchtende wieder verschwindet. Das Beispiel zeigt aber auch, dass Gekerbtes wie Glattes und darin ablaufende Prozesse keinesfalls frei von Macht und Gewalt entstehen und verlaufen, auch wenn diese je in unterschiedlichen Bereichen wirken. Entweder ließe sich die Suche nach den Unterdrückungsachsen in dem Fall des Mädchens nun interssektional betreiben oder der Blick in die Raumbewegung muss vom gekerbten in einen glatteren Raum und somit in eine transsektionale Sphäre führen.

Im Anschluss an Begriffe und Kategorien aus dem Umfeld des Intersektionalitätstheorie richtet sich der transsektionale Blick auf Wechselwirkungen und fluide Übergänge von kerbenden und glättenden Bewegungen.

[TRANSSEKTIONALITÄT] Damit hängt ein bestimmtes Verständnis von Performativität zusammen. Dieses beginnt nicht bei individuellen oder empirischen Zusammenhängen, sondern bei Körpern und Praktiken an den identitären Übergängen und inneren Spaltungen. Entsprechend ist die Möglichkeit der zeiträumlichen Verschiebung mitzudenken, weshalb die Perspektive nicht bei der Analyse starrer Sektionen verharren kann. Entsprechend gibt es im transsektionalen Universum keine Gruppen, die nicht längst verschoben, durchquert oder überschritten wären. Damit werden also keine Gruppen von Menschen mit eindeutigen oder zweideutigen Identitäten in den Fokus genommen, sondern es rücken andere Verhältnisse und Körperbewegungen ins Betrachtungsfeld sich verschiebender Ränder. Dies öffnet den Blick für mögliche Überschreitung von Zugehörigkeiten, wie sie auch Bruno Latour anrät, wenn er die Beschränkung durch soziologische Vorannahmen kritisiert und das Verfolgen von Assoziationen einfordert (Latour 2010: 30 u. 273). Man wird im nächsten Schritt die Körper nur noch in ihrer Durchdringung der Grenzen verfolgen können. Dabei sind Körperperformanzen wiederholbar in einem Sinne, den Judith Butler in Anlehnung an Jacques Derrida in *Excitable Speech* beschreibt (Butler 1998: 210). Gleichzeitig sind diese Performanzen in ihrer Iterabilität gerade nicht beliebig, sondern durchzogen von sehr vielen widersprüchlichen Differenzen, in denen je ein Begriff wiederum den anderen axiologisch und auf verdeckte Weise dominiert. In diesem Verständnis von Dekonstruktion werden Differenz-Verhältnisse als Machteffekte erkennbar, indem die Begriffsverhältnisse von Differenzpaaren umgekehrt werden. Das Auslesen von Körpern und Bewegungen, die von einer Vielzahl an Differenzen durchzogen und angetrieben sind, gelangt – um die oben beschriebene Stofflichkeit zurück ins Bild zu bringen – zu jenen unentwirrbaren Fasern, die zwischen Körpern und Räumen, Selbstbeschreibungen, Flüchten und Fluchtlinien in Bewegung verwoben und verfilzt sind.

## GEGENGESCHLECHTLICHE KÖRPER IM RAUM

Ein dynamisch-fluider Körper, dem dieses Sich-Entziehen zugeschrieben wird, wäre bei Deleuze und Guattari der organlose Körper (oK), der zunächst gerade nicht festgelegt ist, sich nicht festlegen lassen will auf männlich/weiblich, hetero-/homosexuell, schwarz/weiß, jung/alt, disabled/able-bodied, Tier/Mensch. Der organlose Körper entzieht sich diesen Kategorien nicht

nur, sondern schafft seine eigenen Existenzbedingungen durch die eigene undefinierte – mehr noch: Er schafft sich die eigene Existenz erst durch aktivistische Desorganisation als körperpolitische Dissidenz. Daher ist dieser Körper, entgegen den Körperbeschreibungen im oben behaupteten Gender-Dispositiv, auch nicht historisch sedimentiert in einer Zweigeschlechterordnung – im Gegenteil. Er ist in chaotischen Sedimentschichten genealogisch verteilt. Doch wirken seine Affizierungen womöglich in die Zukunft und können dadurch Geschichte und Raum als Differenzgeschichte und Raumdifferenz schaffen. Und in dieser angenommenen Produktivität verkörpern solche Körper das Interesse, dass sie auch als offen bzw. durchlässig zu begreifen und in ihren affektiven Bewegungskulturen zu verstehen sind.

Gleichzeitig ermöglicht es der organlose Körper – die Körperbetrachtung vor dem beschriebenen raumtheoretischen Hintergrund –, ein Schlaglicht auf geschlechtliche Organisation von Körpern zu werfen. Denn da auch vergeschlechtlichte Körper in jenen Repräsentationsräumen des Sozialen entstehen und existieren, die wir beschrieben haben, zeigen sich Raum und Geschlecht (auch) im organlosen Körper aufeinander bezogen, ohne dass die Annahme einer Vorgängigkeit des einen die Dynamik des anderen verdecken kann. Es lässt sich paraphrasieren: Geschlechtskörper entstehen im Repräsentationsraum, durch soziale Raumfigurationen und in Raumkörperpraktiken. Zwar scheinen uns soziale Körper zunächst kaum ohne geschlechtliche Konnotationen zu sein und werden als solche meist in Raumpraktiken belebt [KÖRPER], genau dieser Umstand muss aber misstrauisch machen und den Blick immer wieder auf mögliche Transgressionsbewegungen lenken.

Deleuze und Guattari konzipieren jenen organlosen Körper, indem sie die Grenzen und Möglichkeiten ausloten, einen Körper neu im Raum zu verteilen, der gerade nicht durch herkömmliche Körperbestandteile und Relationen untereinander festgelegt ist (Deleuze Guattari 1992: 205-227). Das ist insofern eine entscheidende Dekonstruktion des herkömmlichen Körperbildes, da gerade die Beziehungen der Organe untereinander und der Bezug von Körperteilen aufeinander immanent das Zweigeschlechtermodell fundieren. Die Forderung nach einem organlosen, d.h. einem *a priori* unorganisierten Körper richtet sich daher auch vehement gegen seine Vergeschlechtlichung. Das macht diese Körperdekonstruktion interessant für Studien von Geschlechtskörperpraktiken, die Binarität herstellen. In ihrer Differenz zur Differenz sind die organlosen Körper produktiv mit dem Raum verwoben:

„Ein oK ist so beschaffen, dass er nur von Intensitäten besetzt und bevölkert werden kann. [...] Dennoch, der oK ist kein Schauplatz, kein Ort und nicht einmal ein Träger, auf dem etwas geschehen wird. [...] Der oK lässt Intensitäten passieren, er produziert sie und verteilt sie in einem *spatium*, das selber intensiv ist und keine Ausdehnung hat. Er ist weder ein Raum noch ist er im Raum, er ist Materie, die den Raum bis zu einem bestimmten Grad besetzen wird – der jeweilige Grad entspricht den produzierten Intensitäten. Er ist heftige und nicht geformte, nicht stratifizierte Materie, eine intensive Matrix [...].“ (Deleuze/Guattari 1992: 210 / Hervorhebungen im Original)

Hier beginnen die Körper ihr Werden. In diesem Werden müssen sie sich ihrer Organisation widersetzen, um sich entfalten zu können. Die Organisation ist „eine Schicht auf dem oK [...], ein Phänomen der Akkumulation und der Sedimentierung“, wie Deleuze und Guattari schreiben (ebd.: 218). Das *Wir*, das nicht nur *Ich* ist, kann als ein vergeschlechtlichter Körper bzw. als der Kampf gegen seine Vergeschlechtlichung gelesen werden. Was Deleuze und Guattari hier anbieten, ist ein Blick auf ein *als ob*, das den de-organisierten bzw. deterritorialisierten Körper freilegt, um dessen Konstitutionsbedingungen erkennbar werden zu lassen. Dabei geht seine Oberfläche im Raum, in Raumkörperpraktiken, vollkommen auf. Der Körper *entfaltet* sich im Raum, er wird zur Materie. [MATERIALITÄT]

Geschlecht ist eines der wirkmächtigsten Organisationsprinzipien, die ein organloser Körper bekämpfen bzw. von dem er sich affektiv befreien wollen muss. Verfestigte Raumarrangements, wie beispielsweise die modernen Geschlechtersphären, müssen innerhalb der Desintegration des organlosen Körpers mühsam überschritten werden. Gerade der Blick auf die wechselseitige Bedingtheit sowie auf die gleichzeitig ablaufenden Prozesse von Konstruktion, Konstitution und Überschreitung in den Dynamiken der Veräumlichung bildet neue Fluchtlinien. Vor dieser Folie gelesen ist es ein vergeschlechtetes Heulen, das Deleuze und Guattari an einer Stelle beschreiben: „Der oK heult: Man hat mir einen Organismus gemacht! Man hat mich zu Unrecht gefaltet! Man hat mir meinen Körper gestohlen! Das Gottesgericht reißt ihn aus seiner Immanenz heraus und macht ihm einen Organismus, eine Signifikation, ein Subjekt.“ (ebd.) Demnach wäre die geschlechtliche Faltung innerhalb des *Wir* eine, die das *Ich* entstehen lässt, durch eine gegenđerte Verkürzung – eine ungerechte Faltung eben. Die ungerechte Faltung ist eine, die sich am Körper innerhalb folgender spezifischer Stratifikation vollzieht: „so, dass er zwischen zwei Polen schwankt, zwischen den Oberflächen

der Stratifizierung, um die er herumgeklappt wird und wo er sich dem Urteil unterwirft, und der Konsistenzebene, auf der er sich entfaltet und dem Experimentieren öffnet.“ (ebd.) Nachdem Deleuze und Guattari betont haben, wie vielschichtig und verschränkt die Organisationen sind, stellen sie den permanenten und umkämpften Charakter der Auseinandersetzung heraus; es herrsche ein „ständiger und gewaltsamer Kampf zwischen der Konsistenzebene, die den oK befreit und alle Schichten durchläuft und auflöst, und den Oberflächen der Stratifizierung, die ihn [...] zurückdrängen“ (ebd.: 219).

Ein künftiges Forschungsparadigma zu Dynamiken Raumkörperpraktiken kann nun von dem beschriebenen Fluchtpunkt das Werden im Widerstand entziffern und begleiten. Ergänzend zu Foucault, der die dispositive Genealogie von normierten Körpern beschreibt und Butler, die die performative Bedingtheit ihrer gegenderten Sedimentierung fokussiert, eröffnen Deleuze und Guattari Blickwinkel auf die Überschreitungen des Rahmens durch Körperpraktiken, in denen keine deduzierbare Subjektivierung entsteht. Hier ist der Körper in seinem affektiven Drang zur eigenen Entfaltung der Ausgangspunkt. Individuum und Subjekt lösen sich in einem Körper-*Wir* auf, das radikal praktisch und gegengeschlechtlich konzipiert ist. Dies scheint uns für ein Verhältnis von Körpern im und zum Raum und für die Analyse des Übergangsbereichs zwischen Körper- und Raumkonstitution interessant, da darin die Verräumlichung von Geschlechtskörpern erkennbar wird und der organlose Körper hierin als fluides und dynamisierendes Moment begriffen werden kann. Raum und Geschlecht werden so zu einer Fluchtlinie transsektionaler Blickachsen im *Doing Space while Doing Gender*.

## UNSERE FLUCHTLINIEN

Im weiteren Sinne verbinden sich die hier versammelten Arbeiten und Diskussionen zu Fluchtlinien, aus denen neue Dimensionen hervorgehen können – im Sinne der oben skizzierten Raumstruktur im Rhizom (Deleuze/Guattari 1992: 19). So beschließt eine Podiumsdiskussion den Band, in der wir vor dem Hintergrund des Gender-Dispositivs die Aktualität des Feminismus, Inter- und Transsektionen von Grenz- und Migrationsräumen, mediale Räume und ihre Wirkmacht auf Artikulationsmöglichkeiten, das Potential von Öffnung und Schließung im Zusammenhang mit dem Begriff des Anti-Genderismus diskutiert haben. Zuvor bildeten Studien zu Raum und Geschlecht

ein grobmaschiges empirisches Netz. Bereits im ersten Part des Bandes sind kurze Texte zu finden, die in essayistischer Form ausgewählte Konzepte und Denkfiguren zum Thema fokussieren. So werden die Beiträge zu Exposure, Historisierung, Körper, Materialität, Medialität, Transsektionalität und Visualisierung in diesem Teil Fluchtliniendimensionen aufzeigen, die zu weiteren Forschungen anregen können. Die in diesem Band versammelten Beiträge gehen inter- und transdisziplinär über ein Verständnis hinaus, das einerseits nur nach Ordnungsmustern sucht oder andererseits lediglich politische Perspektiven entwerfen wollte. Die Vielschichtigkeit der Argumente und Untersuchungen operationalisiert zumeist beides und kann in der Reflexion von Prozessen des *Doing Space while Doing Gender* vermeintliche Grenzen überschreiten, auch weil das Netz an Analysen und Ideen sich unserer Einleitung entzieht und dabei den Blick auf neue Vernetzungen von Raumkörperpraktiken und -figurationen öffnet.

Wir beginnen nun am Ende des Bands, die Inhalte zu beschreiben. Die Podiumsdiskussion „Macht, Raum, Geschlecht?“ mit Mechthild Bereswill, Ines Kappert und Simona Pagano, moderiert von Mart Busche und Felix Krämer bildete die letzte Veranstaltung des Graduiertenkollegs „Dynamiken von Raum und Geschlecht“. [DISKUSSION] Ihr Fokus lag auf gegenwärtigen Politiken und Fragen. Ziel war es, eine Art Live-Schaltung herzustellen zwischen der interdisziplinären Forschung, die im Kolleg in den vergangenen Jahren durchgeführt wurde, und den politischen Implikationen in aktuellen Verkörperungen beziehungsweise Verräumlichungen von Geschlecht und sexuellen Identifikationen.

Zuvor hat im Bereich „Studien zu Raum und Geschlecht“ der Text von Joana Coppi „Vergeschlechtlichung und Rationalisierung in Verwaltungspraktiken des öffentlichen Nahverkehrs“ Prozesse der Rationalisierung und Vergeschlechtlichung in den Wissensbeständen von Verwaltungsexpert\_innen rekonstruiert. [VERGESCHLECHTLICHUNG] Im Kontext von effizienzorientierten Restrukturierungen zeigt sie, wie Verwaltungshandeln und -praxis in der Raumproduktion wirkt, die uns alltäglich umgibt, befördert oder unsere Bewegungen etwa begrenzt. Sie erarbeitet wie Wissen über (öffentlichen) Raum und Geschlecht im Zuge dessen mobilisiert wird, insbesondere die impliziten, präreflexiven, nicht intendierten und latenten Dimensionen von Rationalisierung und Vergeschlechtlichung im Feld des Öffentlichen Nahverkehrs in Berlin. Die Verschränkung von Vergeschlechtlichung und



Rationalisierung diskutiert sie an den empirisch gebildeten Dimensionen Raum, Ökonomie, Markt, Preis und Effekt.

Marei Schmoliner problematisiert in ihrem Beitrag „Tahrirplatz in Köln“ die diskursive Herstellung eines Bezugs zwischen der ägyptischen Revolution und den Ereignissen auf dem Kölner Bahnhofsvorplatz in der Silvesternacht von 2015 in verschiedenen deutschsprachigen Medien. [TAHRIRPLATZ] Sie zeigt wie in beiden Fällen Männlichkeit(en) und Differenz entscheidende Markierungsfunktionen zukommen und wie und wo Frauenkörper zur Fläche gesellschaftlicher Machtverhandlung werden. [EXPOSURE] Der Vergleich beider Ereignisse durch die Medien macht deutlich, wie ein Unterschied zwischen „arabisch/nordafrikanischen“ Männern und „zivilisiert-modernen Deutschen“ konstruiert wurde.

Beatrice Frasl untersucht die Vieldeutigkeit popkultureller Artikulationen anhand von Disneyfilmen über die Zeit hinweg. Neben dem Zugriff auf Filme als Narrationsräume arbeitet sie eine vierphasige Entwicklung der Darstellungen von verworfener Männlichkeit und Weiblichkeit heraus. [MONSTER] Frasl verweist auf die Bedeutung von Körper und Körpersprache in den Filmen, die die Performativität von *gender* offenlegen und gleichzeitig die Problematisierung einer romantisierten, heteronormativen und patriarchalen Gesellschaftsordnung erlauben. [MEDIALITÄT]

Gabriele Hassler stellt in ihrem Beitrag die Selbstinszenierung von Gloria Fuertes als harmlose Unterhalterin und Kinderbuchautorin vor, die der Lyrikerin Zugang zum öffentlichen Diskurs und Raum in einen männlich dominierten und strikt zensierten Literaturmarkt unter Francisco Franco verschaffen. So zeigt sie, wie im Zusammenspiel von Sprachspielen, dem Blick auf den Körper, Humor und intertextuellen Verweisen ein alternativer Erfahrungsraum von queeren Weiblichkeitsentwürfen hergestellt wird, der *Gender* als durch Inszenierungen und soziale Praktiken perpetuiertes und performativ hervorgebrachtes Konstrukt enttarnt. Gabriele Hassler zeigt darin Dynamik und Widerstandspotential im Projektionsfeld eines Frauenbilds, das zwischen den Polen der „perfekten Haus- und Ehefrau“ und der „Wahnsinnigen“ oszilliert. [MUTTERSCHAFT]

Björn Kleins Beitrag zu Female Impersonation in New York um 1900 setzt sich auf die Spuren autoethnographischer Aufzeichnungen des *Female Impersonators* Ralph Werther. [IMPERSONATION] Er arbeitet Körperpraktiken wie *Cross-Dressing* und Körpermodifikationen sowie Praktiken der Selbstbeschreibung und des Schreibens zwischen 1892 und 1922 in New

York heraus und bindet sie an das Narrativ der *underworld* zurück. Klein untersucht das Zusammenspiel von Raumkörperpraktiken des sich Einschreibens, Ver(un)eindeutigens im Rechts- und Sexualitätsdiskurs aber auch das Agieren Werthers im Stadtraum.

Tamara Frey stellt in ihrem Beitrag „Der ‚imperfekte‘ Körper auf dem Heiratsmarkt – ein Beitrag zu Disability in Heiratsannoncen des Kaiserreichs“ eine intersektionale Analyse vor. [HEIRATSMARKT] Die Annoncen stellten einen Kommunikationsraum zwischen räumlich getrennten Menschen her und funktionierten als Markt. Trotz der Verschleierung seiner ökonomischen Mechanismen, erforderte die Orientierung an Angebot und Nachfrage die soziale Verortung der Subjekte anhand verschiedener Ressourcen und Kapitalsorten, was genderspezifisch stattfand. Dieses *doing gender* verband sich intersektional mit anderen Kategorien: Im Versuch, sich erfolgreich in den medialen Kommunikationsraum einzuschreiben, fand ein komplexes *doing class while doing ability while doing gender* statt.

Im abschließenden Beitrag des nächsten, des Fluchtlinien-Parts, widmet sich Silke Förschler einer spezifischen Form der Medialität, der Visualität. Sie zeigt wie in der Kunst, im Film, in der Werbung und in bildgebenden Verfahren ein „Feld gesellschaftlicher Bedeutungsproduktion“ (Schaffer 2008: 12) als Komplement zur „Sprachlastigkeit“ anderer Wege von Mitteilung wirkt. Dabei dekonstruiert sie die Annahme, dass Sachverhalte sichtbar gemacht und damit durchdrungen werden könnten. Förschler zeigt wie bei der materiellen Produktion eines Bildes ebenso auf sozial und institutionell eingeübte Sehgewohnheiten und verfestigte Geschlechter- und Raumkonstruktionen zurückgegriffen wird, wie in der Rezeptionssituation. Sie geht dabei auch auf den exponierten Körper [EXPOSURE] als konstant wichtige, vergeschlechtlichte und verräumlichte Bezugsgröße ein und fordert in der Genderforschung Fragen nach „Visualität“ zu stärken. [VISUALISIERUNG]

Björn Klein und Felix Krämer stellen Transsektionalität als eine Perspektive vor, die Körperdynamiken im Raum und durch Räume verfolgt. Anhand von *trans-class*-, *trans-race*- und *trans-gender*-Begehren in Schriften von historischen Figuren zeigen sie die theoretischen Überschreitungsmöglichkeiten einer auf Identitätsgruppen fixierten Raumanalyse. Transsektionalität lehnt sich an das Intersektionalitätskonzept an, wobei es dieses gleichzeitig erweitert. Klein und Krämer betonen, dass sich die beiden Konzepte wie zwei Universen betrachten lassen, die durch gemeinsame Fluchtlinien zu einem

Resonanzraum verbunden werden können, insbesondere weil Transsektionalität sich auch zu den Transgender-Studien seit den 1990er Jahren in Beziehung setzen lässt. [TRANSSEKTIONALITÄT]

Ausgehend von Mikhail Bakhtins Chronotopos eröffnet Maria Fritsche in ihrem Beitrag zu [MEDIALITÄT] einen Abriss zur spezifischen Wirkkraft des Films in seiner Fähigkeit, Zeit zu verräumlichen und Dingen eine besondere emotionale Qualität zuzuweisen. So können Filme zwischen Welt(-wahrnehmung) und Mensch vermitteln und selbst zum Projektions- und Erfahrungsraum werden, in denen gesellschaftliche Ängste sichtbar und begreifbar werden. Fritsche zeigt dabei, wie Bewegungen und Konstellationen, etwa die Bildkomposition, Kameraführung, Montage oder Spezialeffekte, unseren Blick lenken und nicht nur die zeitlich begrenzte Illusion von Realität schaffen, sondern auch Fokussierungen und Auslassungen herstellen, die etwa mit dem Gefühl einer ins Wanken geratenen Geschlechter- und Gesellschaftsordnung verbunden sein können.

Heiko Stoff entfaltet eine wissenschaftsgeschichtliche Perspektive auf Materialität als politische Kategorie in der Geschlechtskörperkultur. Ausgehend von den grundlegenden Ansätzen aus dem 20. Jahrhundert (Lenin 1987 [1909], Butler 1995) zeigt er auf, dass sich *Doing Gender* und *Making Sex* nicht trennen lassen. Dabei seien insbesondere die Praktiken der Materialisierung von politischem und wissenschaftlichem Interesse. Erst wenn Materie als konkrete gesellschaftliche Praxis verstanden werde, könnten die konkreten Praktiken der Materialisierung auch entsprechend analysiert werden. Stoff erinnert an Donna Haraways Aufforderung, sich mit der Materialität des biologischen Geschlechts auseinanderzusetzen (Haraway 1995: 92), um feministischer Kritik analytische Schärfe zu geben. [MATERIALITÄT]

Imke Schmincke zeigt in ihrer Fluchtlinie zum Körperbegriff, dass menschliche Körper weder ‚nur‘ Natur und Materie sind, noch vollkommen gesellschaftlich normierte Produkte sozialer Praxis. Körper seien stets beides, Voraussetzung und Ergebnis einer sozial-kulturellen Bearbeitung dessen, was Menschen sich als ‚Natur‘ vorstellen. Gleichzeitig hinterfragt Schmincke die historisch gewachsene Binarität von ‚Natur‘ und ‚Kultur‘. Unsere Art und Weise über Körper zu sprechen, sie wahrzunehmen und zu fühlen sind stets historisch und kulturell spezifisch. Dies differenziert sie anhand der drei Dimensionen *Körper und Geschlecht*, *Körper und Raum* sowie *Körper zwischen Wissenschaft und Politik*. [KÖRPER]

Marian Füssel fokussiert in seinem Fluchtlinien-Beitrag die Historizität der Kategorien Raum und Geschlecht, die in ihrer Relationalität und in ihren Praktiken stets geschichtlich zu denken seien. [HISTORISIERUNG] Er argumentiert mit Koselleck (2003), dass Raum, und analog dazu Geschlecht, einerseits notwendige Bedingung sei, um eine Geschichte zu erzählen, andererseits auch immer eine eigene Geschichte habe, die sozialen, ökonomischen und politischen Veränderungen unterliege. Für Geschlecht spielt er dies am Beispiel von Thomas Laqueurs Studie (1990) zur Wandlung vom Ein-Geschlecht zum Zwei-Geschlechter-Modell durch und zeigt, dass auch die Geschlechterforschung wesentlich als Geschlechter*geschichts*forschung den Schluss ziehe, dass diese Kategorien produziert und veränderbar seien.

Susanne Krasmann und Christine Hentschel stellen eine Erweiterung des Vulnerabilitätskonzeptes durch den Begriff *Exposure* vor. [EXPOSURE] Verletzlichkeit sei als eine sozial und physisch verankerte „Grundbedingung des Lebens“ zu verstehen. Mit Judith Butler (2005, 2010) argumentieren sie, dass Verletzlichkeit auch eine Frage der Anerkennung und der Hierarchisierung ist. Ihr Konzept der Exposure ermögliche es, die verschiedenen Seiten von Verletzlichkeit zu erfassen: das Moment des Ungeschützt- und Ausgesetzt-Seins wie das des Sich-Zeigens und das Ereignishafte in beidem. Der Beitrag hebt hervor, dass Exposure immer an eine Öffentlichkeit gebunden ist – als Unterbrechung des Gewohnten sei das Moment singulär. Der Raum als Kontaktfläche und Ort von Kollektivität mit auch einer materiellen Struktur spiele dabei eine besondere Rolle: Akte der Exposure verändern die Beschaffenheit, die Sichtbarkeit und die Bedeutung dieser Strukturen, in denen ein „Dazwischen“ und die Kontaktflächen des öffentlichen Raums verhandelt werden.

Mit diesem ersten Fluchtlinienbeitrag wird auch die Auseinandersetzung mit Forschungen zu Raum und Geschlecht als eine Geschichte gegenwärtiger Raumverhältnisse beginnen. Die anschließenden Texte fächern Argumente weiter auf und unterfüttern diese theoretisch wie empirisch. Am Ende wollen wir zum Anfang und zur Gegenwart zurückkommen – sicher nicht, ohne woanders gelandet zu sein.

## LITERATUR

- Alexander, Michelle (2010): *The New Jim Crow. Mass Incarceration in the Age of Colorblindness*, New York: The New Press.
- Bauer, Jenny (2015): „Differentielles Denken, heterogene Räume und Konzepte von Alltäglichkeit. Anknüpfungen an Henri Lefebvres Raumkonzept aus feministischer Perspektive“, in: Sonja Lehmann/Karina Müller-Wienbergen/Julia Elena Thiel (Hg.), *Neue Muster, alte Maschen? Interdisziplinäre Perspektiven auf die Verschränkungen von Geschlecht und Raum*, Bielefeld: transcript, S. 23-41.
- Baumgärtner, Ingrid/Melanie Panse (Hg.) (2016): *Kreuzzug und Gender. Das Mittelalter 1, 21*, S. 1-20.
- Bennett, Judith (2007): *History Matters. Patriarchy and the Challenge of Feminism*, Philadelphia: University of Pennsylvania Press.
- Bhabha, Homi K. (1994): *The Location of Culture*, London: Routledge.
- Bock, Gisela/Zimmermann, Margarete (Hg.) (1997): *Die europäische Querelle des Femmes. Geschlechterdebatten seit dem 15. Jahrhundert*, Stuttgart: Metzler 1997.
- Bock, Gisela (2000): *Frauen in der europäischen Geschichte*, München: Beck.
- Böhme, Hartmut (Hg.) (2005): *Topographien der Literatur. Deutsche Literatur im transnationalen Kontext*, Stuttgart/Weimar: Metzler.
- Bourdieu, Pierre (1982): *Die feinen Unterschiede. Kritik der gesellschaftlichen Urteilskraft*, Frankfurt a. M.: Suhrkamp.
- Bührmann, Andrea & Schneider, Werner (2008): *Vom Diskurs zum Dispositiv. Eine Einführung in die Dispositivanalyse*, Bielefeld: transcript.
- Butler, Judith (1993): *Bodies That Matter: On the Discursive Limits of Sex*, New York: Routledge.
- Butler, Judith (1995): *Körper von Gewicht. Die diskursiven Grenzen des Geschlechts*, Frankfurt a. M.: Suhrkamp.
- Butler, Judith (1997): *Excitable Speech. A Politics of the Performative*, New York: Routledge.
- Butler, Judith (1998): *Haß spricht. Zur Politik des Performativen*, Berlin: Berlin Verlag.
- Butler, Judith (2001): *Psyche der Macht. Das Subjekt der Unterwerfung*, Frankfurt a. M.: Suhrkamp.

- Castro Varela, María do Mar/Dhawan, Nikita (2015): Postkoloniale Theorie. Eine kritische Einführung, Bielefeld: transcript.
- Chakrabarty, Dipesh (2000): Provincializing Europe. Postcolonial Thought and Historical Difference, Princeton (NJ): University of Princeton Press.
- Combahee River Collective (1997 [1977]): „A Black feminist statement“, in: Linda Nicholson (Hg.), The second wave. A reader in feminist theory, New York: Routledge, S. 63-70.
- Cortázar, Julio (2010): „El otro cielo“, in: ders., Cuentos completos I, Madrid: Santillana, S. 622-639.
- Crenshaw, Kimberlé (1989): „Demarginalizing the Intersection of Race and Sex: A Black Feminist Critique of Antidiscrimination Doctrine, Feminist Theory, and Antiracist Politics“, in: University of Chicago Legal Forum, S. 139-167.
- Crenshaw, Kimberlé (1991): „Mapping the Margins: Intersectionality, Identity Politics, and Violence against Women of Color“, in: Stanford Law Review 43, 6, S. 1241-1299.
- Deleuze, Gilles/Guattari, Félix (1977): Rhizom, Berlin: Merve.
- Deleuze, Gilles/Guattari, Félix (1992): Tausend Plateaus. Kapitalismus und Schizophrenie, Berlin: Merve.
- Duden, Barbara (1987): Geschichte unter der Haut. Ein Eisenacher Arzt und seine Patientinnen um 1730, Stuttgart: Klett-Cotta.
- Dünne, Jörg/Günzel, Stephan (Hg.) (2006): Raumtheorie. Grundlagentexte aus Philosophie und Kulturwissenschaften, Frankfurt a. M.: Suhrkamp.
- Eggers, Maisha/Kilomba, Grada/Pesche, Peggy/Arndt, Susan (Hg.) (2006): Mythen, Masken und Subjekte. Kritische Weißseinsforschung in Deutschland, Münster: Unrast.
- Epple, Angelika (2004): Historiographiegeschichte als Diskursanalyse und Analytik der Macht: eine Neubestimmung der Geschichtsschreibung unter den Bedingungen der Geschlechtergeschichte, in: L'Homme. Zeitschrift für Feministische Geschichtswissenschaft, 15, 1, S. 77-96.
- Flüchter, Antje (2015): „Verkörperungen im Raum. Überlegungen aus Perspektive einer Frühneuzeithistorikerin“, in: Sonja Lehmann/Karina Müller-Wienbergen/Julia Elena Thiel (Hg.), Neue Muster, alte Maschen? Interdisziplinäre Perspektiven auf die Verschränkungen von Geschlecht und Raum, Bielefeld: transcript, S. 85-90.

- Förschler, Silke/Habermas, Rebekka/Roßbach, Nikola (Hg.) (2014): Verorten – Verhandeln – Verkörpern. Interdisziplinäre Analysen zu Raum und Geschlecht, Bielefeld: transcript.
- Foucault, Michel (1974 [1966]): Die Ordnung der Dinge. Eine Archäologie der Humanwissenschaften, Berlin: Suhrkamp.
- Foucault, Michel (1978): Dispositive der Macht. Über Sexualität, Wissen und Wahrheit, Berlin: Merve.
- Foucault, Michel (1981 [1969]): Archäologie des Wissens, Frankfurt a. M.: Suhrkamp.
- Foucault, Michel (1983): Sexualität und Wahrheit, Bd. 1. Der Wille zum Wissen, Frankfurt a. M.: Suhrkamp.
- Foucault, Michel (2006 [1967/1984]): „Von anderen Räumen“, in: Jörg Dünne/Stephan Günzel (Hg.), Raumtheorie. Grundlagentexte aus Philosophie und Kulturwissenschaften, Frankfurt a. M.: Suhrkamp.
- Gildemeister, Regine/Wetterer, Angelika (1992): Wie Geschlechter gemacht werden. Die soziale Konstruktion der Zwei-Geschlechtlichkeit und ihre Reifizierung in der Frauenforschung, in: Gudrun-Axeli Knapp (Hg.): Traditionen Brüche. Entwicklungen feministischer Theorie, Freiburg: Kore, S. 201-254.
- Gilroy, Paul (1993): The Black Atlantic: Modernity and Double Consciousness, New York: Verso.
- Goonewardena, Kanishka/Kipfer, Stefan/Milgrom, Richard/Schmid, Christian (Hg.) (2008): Space, Difference, Everyday Life: Reading Henri Lefebvre, London: Routledge.
- Grigg, Jeff W. (2014): The Combahee River Raid: Harriet Tubman & Low-country Liberation, Charleston: The History Press.
- Günzel, Stephan (2015): „Dimensionen des Theoretischen“, in: Sonja Lehmann/Karina Müller-Wienbergen/Julia Elena Thiel (Hg.), Neue Muster, alte Maschen? Interdisziplinäre Perspektiven auf die Verschränkungen von Geschlecht und Raum, Bielefeld: transcript, S. 19-22.
- Günzel, Stephan (2017): Raum. Eine kulturwissenschaftliche Einführung, Bielefeld: transcript.
- Habermas, Rebekka (2000): Frauen und Männer des Bürgertums. Eine Familiengeschichte (1750-1850), Göttingen: Vandenhoeck und Ruprecht.
- Haasis, Lucas/Rieske, Constantin (Hg.) (2015): Historische Praxeologie. Dimensionen vergangen Handelns, Bielefeld: transkript.

- Hausen, Karin (1976): „Die Polarisierung der ‚Geschlechtscharaktere‘ – Eine Spiegelung der Dissoziation von Erwerbs- und Familienleben“, in: Werner Conze (Hg.), Sozialgeschichte der Familie in der Neuzeit Europas. Neue Forschungen, Stuttgart: Klett.
- Honegger, Claudia (1991): Die Ordnung der Geschlechter. Die Wissenschaften vom Menschen und das Weib, 1750-1850, Frankfurt a. M.: Campus.
- hooks, bell (2000): Where we stand. Class matters, New York/London: Routledge.
- Kersten, Susanne (2016): „Besser ist es das zu wollen“ – Geflüchtete Jugendliche zwischen Autonomiestreben und Bindungswünschen, in: Betrifft Mädchen, 30. Jg. 2016, S. 100-104.
- Knapp, Gudrun-Axeli (2010): „‚Intersectional Invisibility‘: Anknüpfungen und Rückfragen an ein Konzept der Intersektionalitätsforschung“, in: Helma Lutz/María Teresa Herrera Vivar/Linda Supik (Hg.), Fokus Intersektionalität. Bewegungen und Verortungen eines vielschichtigen Konzepts, Wiesbaden: VS Verlag, S. 242-264.
- Knapp, Gudrun-Axeli (2013): „Zur Bestimmung und Abgrenzung von ‚Intersektionalität‘. Überlegungen zu Interferenzen von ‚Geschlecht‘, ‚Klasse‘ und anderen Kategorien sozialer Teilung“, in: Erwägen, Wissen, Ethik: EWE 3, 24, Stuttgart: Lucius & Lucius, S. 341-354.
- Krämer, Felix (2016): Hazards of Being a Male Breadwinner: Deadbeat Dads in the United States of the 1980s, in: Historical Social Research/Historische Sozialforschung (HSR), 41, 1, S. 223-239.
- Laqueur, Thomas (1990): Making Sex: Body and Gender from the Greeks to Freud, Cambridge Mass.: Harvard University Press.
- Latour, Bruno (2010): Eine neue Soziologie für eine neue Gesellschaft, Frankfurt a. M.: Suhrkamp.
- Lefebvre, Henri (2006 [1974]): „Die Produktion des Raums“, in: Jörg Dünne, Jörg /Stephan Günzel (Hg.), Raumtheorie. Grundlagentexte aus Philosophie und Kulturwissenschaften, Frankfurt a. M.: Suhrkamp, S. 330 -342.
- Lehmann, Sonja/Müller-Wienbergen, Karina/Thiel, Julia Elena (Hg.) (2015): Neue Muster, alte Maschen? Interdisziplinäre Perspektiven auf die Verschränkungen von Geschlecht und Raum, Bielefeld: transcript.
- Lorenz, Maren (2000): Leibhaftige Vergangenheit. Einführung in die Körpergeschichte, Tübingen: Edition diskord.



- Löw, Martina (1993): Raum ergreifen. Alleinwohnende Frauen zwischen Arbeit, sozialen Beziehungen und der Kultur des Selbst, Bielefeld: Kleine.
- Mackert, Nina (2016): „Kimberlé Crenshaw: Mapping the Margins (1991). Oder: Die umkämpfte Kreuzung“, in: Olaf Stieglitz/Jürgen Martschukat (Hg.), *race & sex: Eine Geschichte der Neuzeit*. 49 Schlüsseltexte aus vier Jahrhunderten neu gelesen, Berlin: Neofelis, S. 50-56.
- Mathes, Bettina/Braun, Christina von (2007): *Verschleierte Wirklichkeit. Die Frau, der Islam und der Westen*, Berlin: Aufbau Verlag.
- McClintock, Anne (1995): *Imperial Leather: Race, Gender, and Sexuality in the Colonial Contest*, New York: Routledge.
- Netzwerk Körper (Hg.) (2012): *What Can a Body Do? Praktiken und Figurationen des Körpers in den Kulturwissenschaften*, Frankfurt a. M.: Campus.
- Opitz-Belakhal, Claudia (2010): *Geschlechtergeschichte*, Frankfurt a. M.: Campus.
- Patterson, Orlando (2008): „Freedom, Slavery, and the Modern Construction of Rights“, in: Hans Joas/Klaus Wiegandt (Hg.), *The Cultural Values of Europe*, Liverpool: Liverpool University Press, S. 115-151.
- Rau, Susanne (2017): *Räume*, Frankfurt a. M.: Campus.
- Reckwitz, Andreas (2008): *Subjekt*, Bielefeld: transcript.
- Ruhne, Renate (2011): *Raum Macht Geschlecht. Zur Soziologie eines Wirkungsgefüges am Beispiel von (Un)Sicherheiten im öffentlichen Raum*, Wiesbaden: VS Verlag.
- Schlögel, Karl (2002): „Kartenlesen, Raumdenken. Von einer Erneuerung der Geschichtsschreibung“, in: *Merkur* 56, 4, S. 308-318.
- Schuster, Nina (2010): *Andere Räume. Soziale Praktiken der Raumproduktion von Drag Kings und Transgender*, Bielefeld: transcript.
- Scott, Joan (1988), *Gender and the Politics of History*, New York: Columbia University Press.
- Soja, Edward W. (1989): *Postmodern Geographies: The Reassertion of Space in Critical Social Theory*, London/New York: Verso.
- Soja, Edward W. (1996): *Thirdspace: Journeys to Los Angeles and Other Real-and-Imagined Places*, Oxford: Basil Blackwell.
- Soja, Edward W. (2005): „Trialektik der Räumlichkeit“, in: Robert Stockhammer (Hg.), *TopoGraphien der Moderne. Medien zur Repräsentation und Konstruktion von Räumen*, München: Wilhelm Fink Verlag, S. 93-123.

- Spivak, Gayatri Chakravorty (2014): Kritik der postkolonialen Vernunft. Hin zu einer Geschichte der verrinnenden Gegenwart, Stuttgart: Kohlhammer.
- Stoff, Heiko (1999): „Diskurse und Erfahrungen. Ein Rückblick auf die Körpergeschichte der 90er Jahre“, in: 1999. Zeitschrift für Sozialgeschichte des 20. und 21. Jahrhunderts, 14, 2, S. 142-160.
- Stoler, Ann Laura (1995): Race and the Education of Desire: Foucault's History of Sexuality and the Colonial Order of Things, Durham: Duke University Press.
- Trepp, Anne-Charlott (1996): Sanfte Männlichkeit und selbständige Weiblichkeit. Frauen und Männer im Hamburger Bürgertum zwischen 1770 und 1840, Göttingen: Vandenhoeck & Ruprecht.
- Van Dyk, Silke (2013): „Was die Welt zusammenhält. Das Dispositiv als Assoziation und performative Handlungsmacht“, in: Zeitschrift für Diskursforschung, 1 (1), S. 44-66.
